# Supplementary material for: Association between vascular endothelial growth factor gene polymorphisms and the risk and prognosis of renal cell carcinoma: A systematic review and meta-analysis
Source: PubMed Central journal article supplement (PMC5564826; doi:10.18632/oncotarget.17293), 2017-04-20
Supplement: oncotarget-08-50034-s001.pdf [file oncotarget-08-50034-s001.pdf]

## **Association between vascular endothelial growth factor gene polymorphisms and the risk and prognosis of renal cell carcinoma: A systematic review and meta-analysis**

### **SUPPLEMENTARY MATERIALS**

#### **SUPPLEMENTARY TABLE**

**Supplementary Table 1: Results of subgroup analysis by ethnicity in the association between VEGF polymorphisms and RCC susceptibility**

See Supplementary File 1
